# Supplementary material for: Durable T cell responses contrast with faster antibody waning in BNT162b2-vaccinated elderly at 6 month
Source: Research Square preprint supplement (doi:10.21203/rs.3.rs-1103804/v1), 2021-12-09
Supplement: Supplementary file 1 [file f9e1a590000481723e9141b3.pdf]

**Supplementary Table 1. Characteristics of the study population**

| <b>Characteristics</b>         | <b>&lt;60 years</b> | <b>≥60 years</b> | <b>Total cohort number (%)</b> |
|--------------------------------|---------------------|------------------|--------------------------------|
| <b>Total</b>                   | 178 (57.1)          | 134 (42.9)       | 312                            |
| <b>Gender</b>                  |                     |                  |                                |
| Male (%)                       | 51 (28.3)           | 79 (61.7)        | 130 (41.7)                     |
| Female (%)                     | 127 (69.7)          | 55 (30.3)        | 182 (58.3)                     |
| <b>Ethnicity</b>               |                     |                  |                                |
| Chinese (%)                    | 106 (46.9)          | 120 (53.1)       | 226 (72.4)                     |
| Indians (%)                    | 14 (60.9)           | 9 (39.1)         | 23 (7.6)                       |
| Malays (%)                     | 26 (89.7)           | 3 (10.3)         | 29 (8.8)                       |
| Others (%)                     | 32 (94.1)           | 2 (5.9)          | 34 (11.2)                      |
| Median years (minimum-maximum) | 35 (22-59)          | 69 (60-82)       | 50.85 (22-82)                  |

**Supplementary table 2.** Immune reactivity across timepoints

| Assays                       | Proportion of volunteers with response above individual baseline *<br>(%) |                |                |
|------------------------------|---------------------------------------------------------------------------|----------------|----------------|
|                              | At day 21                                                                 | At day 90      | At day 180     |
| Anti-spike protein IgG (SFB) | 306/312 (98)                                                              | 311/312 (99)   | 311/312 (99)   |
| Anti-RBD IgG (Roche S)       | 310/312 (99.3)                                                            | 312/312 (100)  | 312/312 (100)  |
| sVNT                         | 247/312 (79.1)                                                            | 309/312 (99)   | 293/312 (93.9) |
| B cell Elispot               | 17/35 (48.6)                                                              | 28/35 (80)     | 30/35 (85.7)   |
| IL-2 T cells                 | 155/155 (100)                                                             | 155/155 (100)  | 155/155 (100)  |
| IFN $\gamma$ T cells         | 144/155 (92.9)                                                            | 149/155 (96.1) | 153/155 (98.7) |
| CD8 T cell Elispot           | 39/72 (54.2)                                                              | 54/72 (75)     | 29/72 (40.3)   |
| CD4 Th1 Elispot              | 54/78 (69.2)                                                              | 66/78 (84.6)   | 65/78 (83.3)   |
| CD4 Th2 Elispot              | 42/71 (59)                                                                | 42/71 (59)     | 35/71 (49)     |

\* Paired samples

**Supplementary table 3.** Long-term immune responses in vaccinated individuals

| Assays                       | Proportion of individuals with a lower response at day 180 compared with day 90 (%)* |                |                |                   |
|------------------------------|--------------------------------------------------------------------------------------|----------------|----------------|-------------------|
|                              | Total population                                                                     | < 60 years     | ≥60 years      | <i>P value</i> ** |
| Anti-spike protein IgG (SFB) | 243/312 (78)                                                                         | 176/178 (98.9) | 66/134 (49.2)  | 0.0001            |
| Anti-RBD IgG (Roche S)       | 243/312 (77.8)                                                                       | 153/178 (85.9) | 89/134 (66.4)  | 0.0001            |
| sVNT                         | 243/312 (77.5)                                                                       | 119/178 (66.8) | 123/134 (91.8) | NS                |
| B cell Elispot               | 10/34 (29.4)                                                                         | 3/16 (18.75)   | 7/18 (52.9)    | NS                |
| IL-2 T cells                 | 97/155 (62.5)                                                                        | 56/81 (69.1)   | 40/74 (54)     | NS                |
| IFN $\gamma$ T cells         | 72/155 (46.5)                                                                        | 49/81 (60.4)   | 24/74 (32)     | 0.0003            |
| CD8 T cell Elispot           | 45/72 (67.9)                                                                         | 31/45 (68.9)   | 13/27 (48.1)   | NS                |
| CD4 Th1 Elispot              | 37/79 (46.8)                                                                         | 21/51 (41.2)   | 16/28 (57.1)   | NS                |
| CD4 Th2 Elispot              | 35/71 (50.7)                                                                         | 30/51 (58.2)   | 11/20 (55)     | NS                |

\* Paired samples

\*\* Difference between age groups

**Supplementary table 4.** Low responders as determined by the SFB assay

| Days                                                 | 21    |                      | 90                |                      | 180              |                      |
|------------------------------------------------------|-------|----------------------|-------------------|----------------------|------------------|----------------------|
| Median antibody response<br>(% binding)              | 28.3% |                      | 41.98%            |                      | 23.35%           |                      |
| Proportion of low responders*<br>(n / tested number) | -     |                      | 37.2<br>(116/312) |                      | 22.2<br>(88/312) |                      |
|                                                      |       |                      |                   |                      |                  |                      |
| Age (Years)                                          | N     | % of total<br>cohort | N                 | % of total<br>cohort | N                | % of total<br>cohort |
| <60                                                  | 57    | 18.2                 | 42                | 13.5                 | 40               | 12.8                 |
| >60                                                  | 99    | 31.7                 | 74                | 23.7                 | 48               | 13.5                 |

\* Low responders are defined as fully vaccinated individuals with antibody response below cohort's median response at consecutive timepoints (%). For example, the low responders, at day 90, have antibody response below cohort's median response at both day 21, 90 and 180.

**Supplementary table 5.** Low responders as determined by Roche S

| Days                                               | 21    |                      | 90                |                      | 180              |                      |
|----------------------------------------------------|-------|----------------------|-------------------|----------------------|------------------|----------------------|
| Median antibody response<br>(U/ml)                 | 50.28 |                      | 927               |                      | 677              |                      |
| Proportion of low responders*<br>(n/tested number) | -     |                      | 36.5<br>(114/312) |                      | 31.4<br>(98/312) |                      |
| Age (Years)                                        | N     | % of<br>total cohort | N                 | % of total<br>cohort | N                | % of total<br>cohort |
| <60                                                | 60    | 19.2                 | 32                | 10.25                | 26               | 8.3                  |
| >60                                                | 99    | 31.7                 | 82                | 26.2                 | 69               | 22                   |

\* These values were determined as in Supplementary table 4.

**Supplementary table 6.** Low responders as determined by sVNT

| Days                                               | 21    |                   | 90                |                    | 180               |                   |
|----------------------------------------------------|-------|-------------------|-------------------|--------------------|-------------------|-------------------|
| Median inhibition (%I)                             | 56.39 |                   | 89.87             |                    | 67.4              |                   |
| Proportion of low responders*<br>(n/tested number) | -     |                   | 39.1<br>(122/312) |                    | 34.9<br>(109/312) |                   |
| Age (Years)                                        | N     | % of total cohort | N                 | % of total cohort3 | N                 | % of total cohort |
| <60                                                | 53    | 16.9              | 38                | 12.18              | 35                | 11.2              |
| >60                                                | 104   | 33                | 84                | 26.9               | 74                | 23.7              |

\* These values were determined as in Supplementary table 4.

**Supplementary table 7.** Low responders as determined by measurement of IL-2 production by T cells

| Days                                                    | 21    |                      | 90               |                      | 180              |                         |
|---------------------------------------------------------|-------|----------------------|------------------|----------------------|------------------|-------------------------|
| Median antibody response<br>(pg/ml)                     | 54.48 |                      | 89.39            |                      | 78.06            |                         |
| Proportion of low<br>responders*<br>(n / tested number) | -     |                      | 29.7<br>(46/155) |                      | 25.2<br>(39/155) |                         |
| Age (Years)                                             | N     | % of total<br>cohort | N                | % of total<br>cohort | N                | % of<br>total<br>cohort |
| <60                                                     | 40    | 25.8                 | 25               | 16.1                 | 21               | 13.5                    |
| >60                                                     | 37    | 23.9                 | 21               | 13.5                 | 18               | 11.6                    |

\* These values were determined as in Supplementary table 4.

**Supplementary table 8.** Low responders as determined by measurement of IFN- $\gamma$  production by T cells

| Days                                                 | 21    |                   | 90               |                   | 180              |                   |
|------------------------------------------------------|-------|-------------------|------------------|-------------------|------------------|-------------------|
| Median antibody response (U/ml)                      | 11.69 |                   | 33.81            |                   | 32.43            |                   |
| Proportion of low responders*<br>(n / tested number) | -     |                   | 32.2<br>(50/155) |                   | 26.5<br>(41/155) |                   |
| Age (Years)                                          | N     | % of total cohort | N                | % of total cohort | N                | % of total cohort |
| <60                                                  | 33    | 21.2              | 22               | 14.2              | 20               | 12.9              |
| >60                                                  | 45    | 29                | 28               | 18                | 21               | 13.5              |

\* These values were determined as in Supplementary table 4. The median values were at day 21: 11.69 pg/ml, at day 90: 33.81 pg/ml and day 180: 32.43 pg/ml).



**Supplementary table 9.** Low responders as determined by CD4 Th1 ELISPOT

| Days                                                 | 21    |                      | 90              |                      | 180           |                         |
|------------------------------------------------------|-------|----------------------|-----------------|----------------------|---------------|-------------------------|
| Median antibody response<br>(Spot forming units)     | 53.48 |                      | 89.39           |                      | 78.06         |                         |
| Proportion of low responders*<br>(n / tested number) | -     |                      | 19.2<br>(15/78) |                      | 6.4<br>(5/78) |                         |
| Age (Years)                                          | N     | % of total<br>cohort | N               | % of total<br>cohort | N             | % of<br>total<br>cohort |
| <60                                                  | 22    | 28.2                 | 8               | 10.2                 | 1             | 1.2                     |
| >60                                                  | 13    | 16.7                 | 7               | 9                    | 4             | 6.4                     |

\* These values were determined as in Supplementary table 4.

**Supplementary table 10.** Low responders as determined by CD8 ELISPOT

| Days                                                 | 21    |                      | 90            |                      | 180             |                         |
|------------------------------------------------------|-------|----------------------|---------------|----------------------|-----------------|-------------------------|
| Median antibody response<br>(Spot forming units)     | 44.85 |                      | 71.65         |                      | 180.42          |                         |
| Proportion of low responders*<br>(n / tested number) | -     |                      | 36<br>(26/72) |                      | 23.6<br>(17/72) |                         |
| Age (Years)                                          | N     | % of total<br>cohort | N             | % of total<br>cohort | N               | % of<br>total<br>cohort |
| <60                                                  | 25    | 42.3                 | 18            | 11.5                 | 13              | 1.2                     |
| >60                                                  | 11    | 57.7                 | 8             | 7.7                  | 4               | 6.4                     |

\* These values were determined as in Table S4. The median values were at day 21: 44.85 SFU, at day 90: 71.65 SFU and day 180: 42.1 SFU).

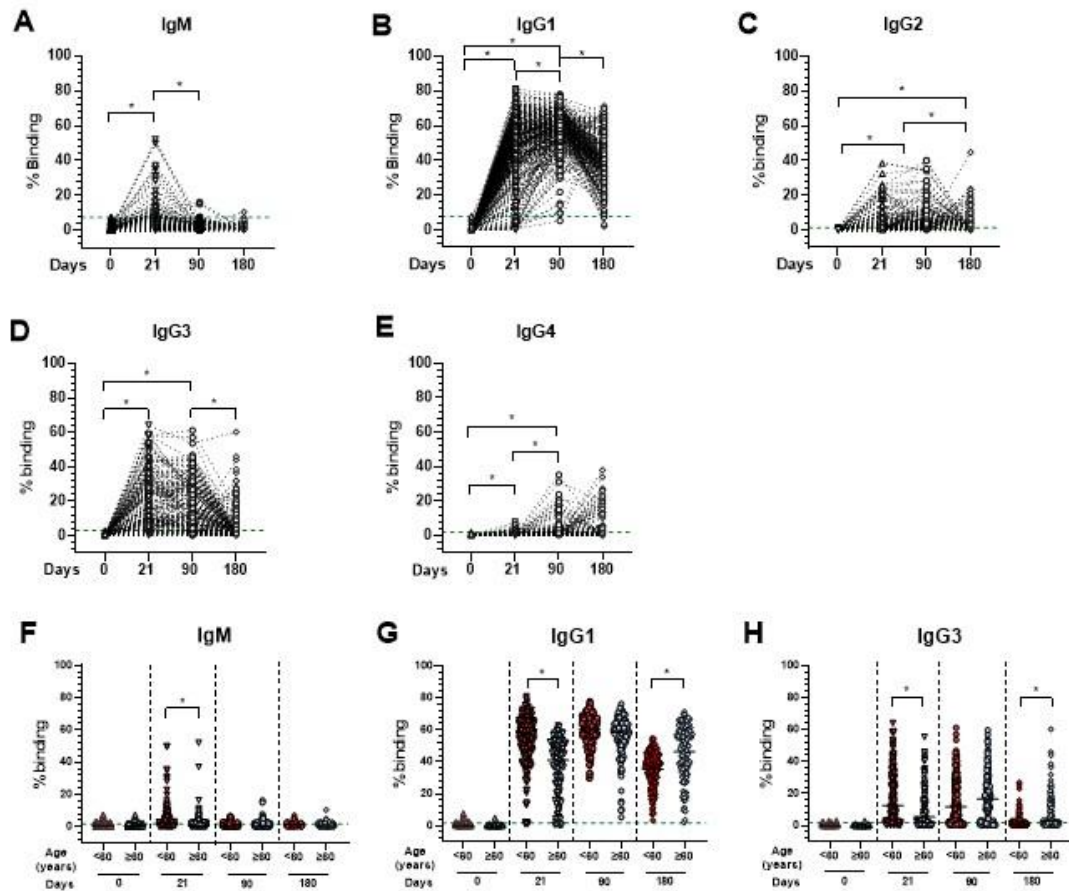

**Supplementary Figure 1. Anti-SARS-CoV-2 spike protein antibody isotype response after vaccination.** A flow cytometry-based assay using the full Spike protein (SFB) assay was used to determine antibody isotype in the same 312 vaccinated individuals described in Figure 1. (A) IgM. Median (range) of values at day 0 was 0.4 (0.0098, 7.385). Antibody levels below the maximum range (7.385) were considered baseline values. \*,  $p < 0.001$ , Friedman test; (B) IgG1. Median (range) of values at day 0 was 0.07 (0.0069, 7.893). Antibody levels below the maximum range (7.893) were considered baseline values. \*,  $p < 0.001$ , Friedman test; (C) IgG2. Median (range) of values day 0 was 0.037 (0.008, 1.44). Antibody levels below the maximum range (1.44) were considered baseline values. \*,  $p < 0.001$ , Friedman test; (D) IgG3. Median (range) of values at day 0 was 0.085 (0.0073-3.19). Antibody levels below the maximum range (3.19) were considered baseline values. \*,  $p < 0.001$ , Friedman test; (E) IgG4. Median (range) of values at day 0 was 0.034 (0.0052, 1.953). Antibody levels below the maximum range (1.953) were considered baseline values. \*,  $p < 0.001$ , Friedman test. (F) IgM, (G) IgG1 and (H) IgG3 antibody levels comparison between the analyzed age groups: <60 ( $n=186$ ) and  $\geq 60$  ( $n=144$ ), at different time points (day 0, 21 and 90). The Median of group values are represented as a line through the dots. The red lines or boxes represent the maximum range of the samples. \*,  $p < 0.001$ , Mann Whitney test.

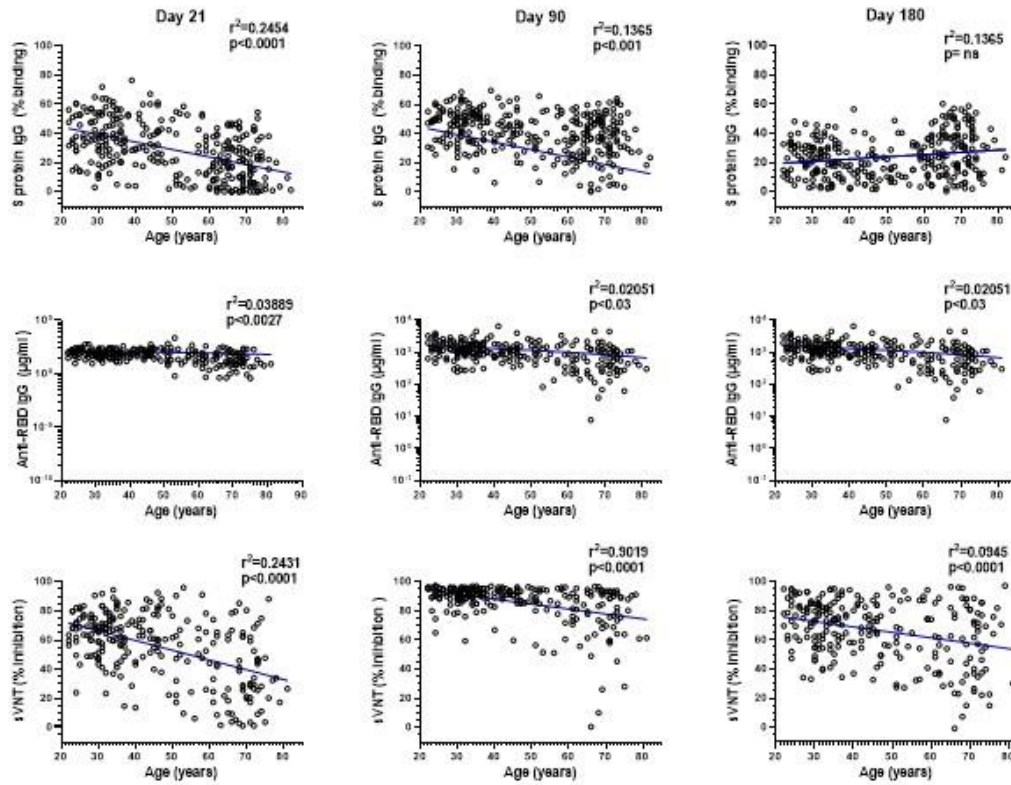

**Figure S2. Linear correlations between participant's age and SARS-CoV-2 specific antibody titer measured at different time after vaccination.** Correlation was analyzed by simple linear regression at day 21, 90 and 180 for the Flow cytometry-based assay for the S-pike protein (SFB) (Higher panels); the commercial RBD Roche S assay (mid panels) ; and the sVNT assay (Lower panels).  $p < 0.05$  was considered statistically significant.



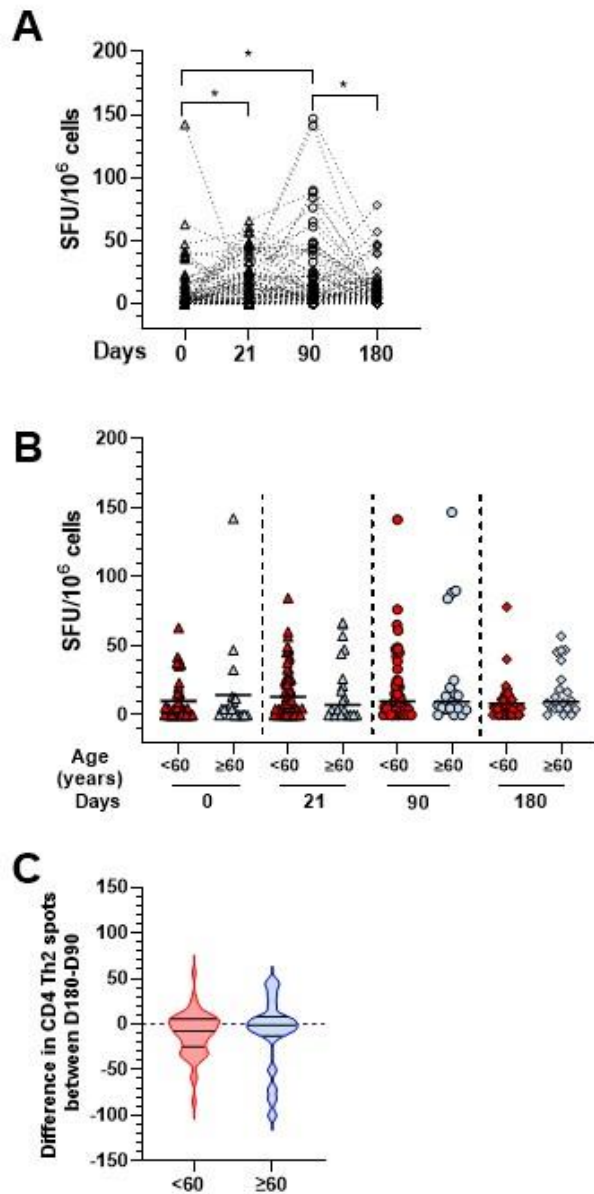

**Figure S3. CD4 Th2 responses.** (A) Kinetics of Spike-protein-specific Th2 cells overtime in vaccinees. CD4 Th2 cells were assayed on a subset of vaccinees (n =71) by IL4/IL5/IL13 ELISPOT using 15 mer pool peptides. Data are presented as spot forming units (SFU) per million of PBMC from paired samples from vaccinated individuals at 4 time points. Each data point represents the normalized mean spot count from duplicate wells for one study participant, after subtraction of the medium-only control \*, p < 0.01, (B) Comparison between the analyzed age groups at day 0, 21, 90 and 180, (n=83), <60: (n= 51) and ≥60 (n=20). Median values are indicated by a dark line. \*, p < 0.01Mann Whitney test. \*, p < 0.01, Mann Whitney test. (C) Violin plots (with median and quartiles) showing difference in CD4 Th2 cell responses measure in the different assays between days 180 and 90 for paired samples for both age groups, <60: (n= 51), and ≥60 (n=20). p = 0.003, Mann Whitney test.
